# Supplementary material for: Exosomes secreted by human cells transport largely mRNA fragments that are enriched in the 3′-untranslated regions
Source: PubMed Central journal article supplement (PMC3732077; doi:10.1186/1745-6150-8-12), 2013-06-07
Supplement: 1745-6150-8-12-S3.pdf [file 1745-6150-8-12-S3.pdf]

| Gene    | Agilent        |              |              |                        |                              | qPCR              |                        |                      |                                             |                                                                                |
|---------|----------------|--------------|--------------|------------------------|------------------------------|-------------------|------------------------|----------------------|---------------------------------------------|--------------------------------------------------------------------------------|
|         | Probe location | Cell         | Exosome      | Exosome/Cell           | 3' Exos/Cell<br>5' Exos/Cell | Amplicon location | Cell $\Delta C_T$      | Exosome $\Delta C_T$ | Exosome $\Delta C_T$ /<br>Cell $\Delta C_T$ | 3' Exos $\Delta CT$ /Cell $\Delta CT$<br>5' Exos $\Delta CT$ /Cell $\Delta CT$ |
| CNDP2   | 5'<br>3'       | 802<br>1396  | 587<br>36397 | 0.732325<br>26.07235   | <br>35.60215755              | 5'<br>3'          | 58.89201<br>5.6962008  | 1.283426<br>3.784231 | 0.02179287<br>0.664342907                   | <br>30.48441594                                                                |
| RHO     | 5'<br>3'       | 28<br>276    | 22<br>58094  | 0.7857143<br>210.48551 | <br>267.8906456              | 5'<br>3'          | 0.9012505<br>0.0647041 | 0.094078<br>0.208772 | 0.10438599<br>3.226567037                   | <br>30.90996253                                                                |
| PPFIBP1 | 5'<br>3'       | 1373<br>1274 | 107<br>12868 | 0.0779315<br>10.100471 | <br>129.6069778              | 5'<br>3'          | 28.640802<br>16497.96  | 1.385109<br>18305.63 | 0.048361406<br>1.109569472                  | <br>22.94328397                                                                |
