# Supplementary material for: Exosomes secreted by human cells transport largely mRNA fragments that are enriched in the 3′-untranslated regions
Source: PubMed Central journal article supplement (PMC3732077; doi:10.1186/1745-6150-8-12), 2013-06-07
Supplement: 1745-6150-8-12-S5.pdf [file 1745-6150-8-12-S5.pdf]

## Additional file 5

### EXPERIMENTAL PART

**Cell culture.** SF-295, a human glioblastoma multiforme cell line, obtained from the NCI-Frederick DCTD Tumor/Cell Line Repository, was maintained in RPMI1640-HEPES (10 mM) medium, supplemented with 10% FBS (fetal bovine serum) and GlutaMAX.

**Preparing exosome-production medium.** FBS-exosome-free, exosome-production medium was prepared according to Théry et al. [1]. Briefly, full medium containing 20% dialyzed FBS was centrifuged 3 hr at 120,000 x g. The supernatant (vesicle-depleted medium) was sterilized using 0.22- $\mu$ m filter.

**Isolation of exosome-like vesicles.** SF-295 cells were grown to 90% confluency and incubated for 48 hr in in RPMI1640-HEPES (10 mM) medium, supplemented with 5% vesicle-depleted FBS. The culture supernatant was centrifuged at 300xg for 10 min to remove floating cells. The supernatant was centrifuged 17,000 x g for 25 min to remove cell debris. The vesicles were pelleted from the resulting supernatant by centrifugation at 110,000 xg for 120 min.

**RNA extraction, quantification and quality assessment.** Total RNA from exosome vesicles and exosome-producing cells was extracted using Trizol (Invitrogen). The concentration of RNA in samples was measured using a NanoDrop®ND-1000 spectrophotometer. RNA size distribution was evaluated using 2100 Bioanalyzer and RNA 6000 Pico Labchip kit (Agilent Technologies; Palo Alto, CA) according to manufacturer's instructions.

**cDNA synthesis and quantitative real-time PCR (RT-PCR).** Two-step RT-PCR was performed using the QuantiTect Reverse Transcription Kit (QIAGEN GmbH, Hilden, Germany) according to manufacturer's recommendations. cDNA synthesis was carried out on 0.5  $\mu$ g of total RNA from which genomic DNA was removed with gDNA wipeout buffer. The supplied primer mix contained a mix of oligo-dT and random primers that enabled cDNA synthesis from all regions of RNA transcripts. The firefly luciferase RNA (Promega) was reverse-transcribed identically to produce cDNA for the use as a spike-in control to evaluate the relative expression levels of various RNA regions. RT-PCR was carried out in a Rotor-Gene Q (Qiagen). Thermal cycling conditions included activation for 10 minutes at 95°C and 40 cycles of 10 seconds at 95°C, 15 seconds at 60°C, and 20 seconds at 72°C. Fluorescence data was recorded at the end of each 72°C step. A DNA melt profile was run subsequently from 72°C to 95°C with a ramp of 1°C/5 seconds. RT-PCR assays were designed for CNBP2, RHO, and PPFIBP1 genes with the amplicons of comparable length at different distances from the mRNA 3'-end (counted from the 5' end - see table below for primer sequences). Where possible, the primers were designed in such a way that the amplified products span an exon/exon boundary.  $\Delta C_T$  for a gene was calculated as a difference between  $C_T$  values for a gene of interest and that for a firefly luciferase cDNA spike-on control.

Oligonucleotide primer sequences for qPCR:

| Target gene/<br>mRNA Accession no. | mRNA Length<br>bp | Forward Primer (5'-3')                       | Reverse Primer (5'-3')                       | Amplicon length<br>bp | Distance from 5'-end<br>bp |
|------------------------------------|-------------------|----------------------------------------------|----------------------------------------------|-----------------------|----------------------------|
| CNDP2/<br>NM_001168499.1           | 4,964             | TGGAGTGCAGCAACAAGAC<br>ATCGCTCCATCTCAGTTGCT  | CACATCCTTGGCAAACCTCT<br>AAGGAGCAGAGACAGGGACA | 215<br>212            | 1,007<br>2,833             |
| RHO/<br>NM_000539.3                | 2,768             | TCATGGTCCTAGGTGGCTTC<br>GCAGGGACAGTCACAGGAAT | GGAAGTTGCTCATGGGCTTA<br>CCCAGGTGCTAGAGCAAAG  | 186<br>231            | 534<br>2,196               |
| PPFIBP1/<br>NM_001198915.1         | 5,807             | GCTTTTGCAGGCTTCTCAAC<br>GCACAATCTCAGTCACTGC  | ACCCGTCCTTCATCAAACCTG<br>CCTGGCTAACACGGTGAAC | 204<br>158            | 2,306<br>5,559             |
